## Correction

**Correction: PKM2 promotes metastasis by recruiting myeloid-derived suppressor cells and indicates poor prognosis for hepatocellular carcinoma****Wei-Ren Liu<sup>1,\*</sup>, Meng-Xin Tian<sup>1,\*</sup>, Liu-Xiao Yang<sup>1,\*</sup>, Yu-Li Lin<sup>2</sup>, Lei Jin<sup>1</sup>, Zhen-Bin Ding<sup>1</sup>, Ying-Hao Shen<sup>1</sup>, Yuan-Fei Peng<sup>1</sup>, Dong-Mei Gao<sup>1</sup>, Jian Zhou<sup>1,3</sup>, Shuang-Jian Qiu<sup>1</sup>, Zhi Dai<sup>1</sup>, Rui He<sup>2</sup>, Jia Fan<sup>1,3</sup> and Ying-Hong Shi<sup>1</sup>**

<sup>1</sup>Department of Liver Surgery, Liver Cancer Institute, Zhongshan Hospital, Fudan University; Key Laboratory of Carcinogenesis and Cancer Invasion of Ministry of Education, Shanghai, People's Republic of China

<sup>2</sup>Department of Immunology, School of Basic Medical Sciences, Shanghai Medical College, Fudan University, Shanghai, People's Republic of China

<sup>3</sup>Institutes of Biomedical Sciences, Fudan University, Shanghai, People's Republic of China

\*These authors have contributed equally to this work

**Published:**

**Copyright:** © 2021 Liu et al. This is an open access article distributed under the terms of the [Creative Commons Attribution License](#) (CC BY 3.0), which permits unrestricted use, distribution, and reproduction in any medium, provided the original author and source are credited.

**This article has been corrected:** In Figure 1, the 2nd row, 3rd panel image is an accidental duplicate of the 2nd row, 2nd panel image. The corrected Figure 1, produced using the original data, is shown below. The authors declare that these corrections do not change the results or conclusions of this paper.

Original article: Oncotarget. 2015; 6:846–861. <https://doi.org/10.18632/oncotarget.2749>

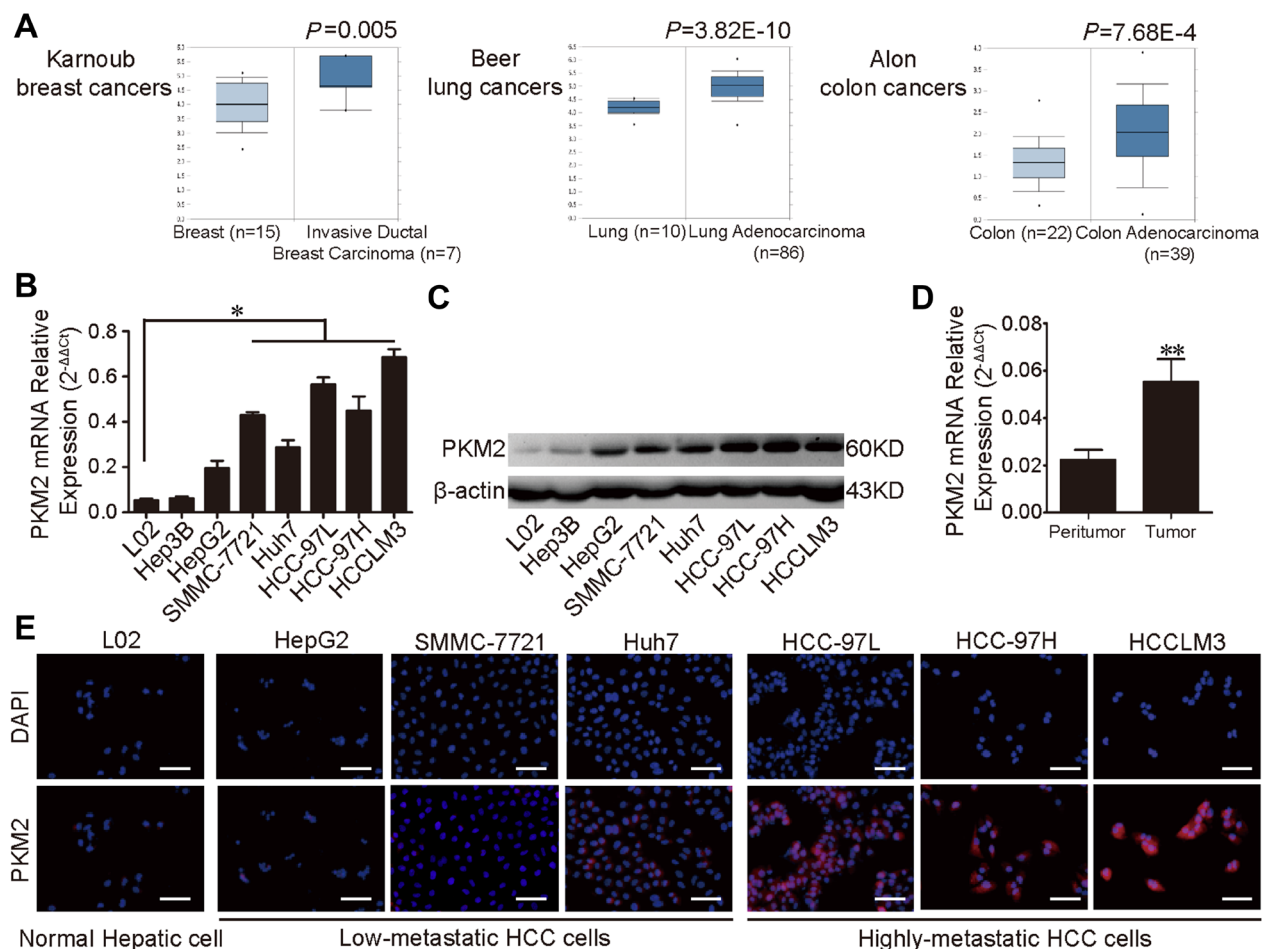

**Figure 1: Expression of PKM2 in human cancers and HCC tissues/cell lines.** (A) Microarray data analyses of PKM2 expression in human cancers are shown. PKM2 mRNA levels in human normal/cancer tissues (breast, lung, and colon) are plotted. The Student *t* test was conducted using the OncoPrint software. The boxes represent the 25th through 75th percentiles. The horizontal lines represent the medians. The whiskers represent the 10th and 90th percentiles, and the asterisks represent the end of the ranges. (B) Quantitative RT-PCR confirmed different PKM2 mRNA expression in HCC cell lines. Data shown as mean ( $\pm$ SD) from three independent experiments. (C) Expression of PKM2 in normal human liver epithelial cells (L02) and 7 HCC cell lines was examined using Western blotting;  $\beta$ -actin was used as a loading control. (D) Quantitative RT-PCR analysis of PKM2 levels in HCC tissues and corresponding peritumoral tissue.  $\beta$ -actin was used as a control. Error bars indicate standard deviation (SD) ( $n = 48$ ). (E) Fluorescence microscopic analysis for PKM2 expression. \* $p < 0.05$ . \*\* $p < 0.01$ .
